# Supplementary material for: Probing the dynamic properties of two sites simultaneously in a protein–protein interaction process: a SDSL-EPR study
Source: Royal Society of Chemistry journal article supplement (doi:10.1039/c9cp04660g), 2019-01-01
Supplement: c9cp04660g1.pdf [file c9cp04660g1.pdf]

## Supporting Information for:

### Probing the dynamic properties of two sites simultaneously in a protein-protein interaction process: a SDSL-EPR study

N. Le Breton,<sup>a,b</sup> S. Longhi,<sup>c</sup> A. Rockenbauer,<sup>d</sup> B. Guigliarelli,<sup>a</sup> S. R. A. Marque,<sup>e</sup> V. Belle\*<sup>a</sup> and M. Martinho\*<sup>a</sup>

*a* Aix Marseille Univ, CNRS, BIP, Marseille, France. [mmartinho@imm.cnrs.fr](mailto:mmartinho@imm.cnrs.fr) and [belle@imm.cnrs.fr](mailto:belle@imm.cnrs.fr)

*b* Université de Strasbourg, CNRS, POMAM, Strasbourg, France (present address)

*c* Aix Marseille Univ, CNRS, AFMB, Marseille, France.

*d* Research Center of Natural Sciences, Budapest University of Technology and Economics, Budapest, Hungary

*e* Aix Marseille Univ, CNRS, ICR, Marseille, France.

#### EPR spectral shape simulations –

All EPR spectra were simulated using an extended version of the ROKI software<sup>1</sup>.

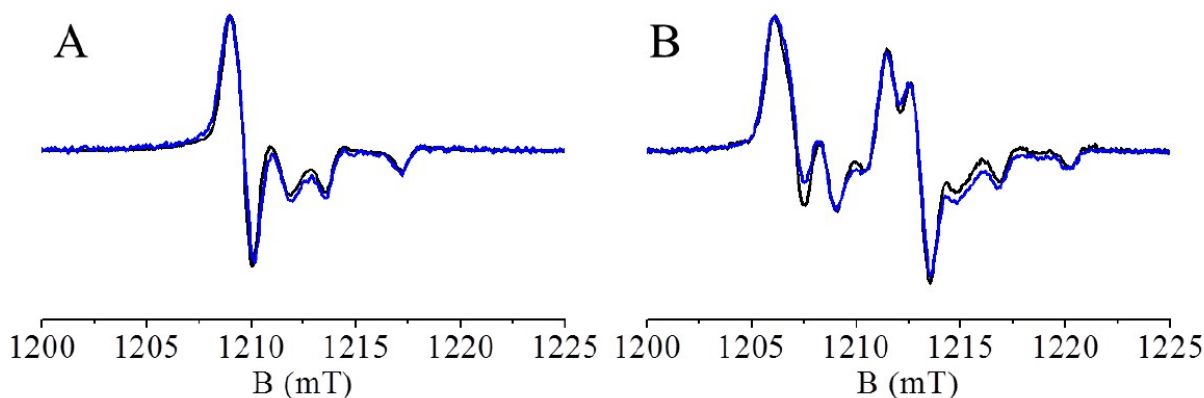

**Figure S1.** Experimental (black line) and simulated (blue line) Q-band EPR spectra of S407C  $N_{TAIL}^P$  (spectrum A) and S407C  $N_{TAIL}^{PP}$  (spectrum B), recorded at 100K using a 100  $\mu$ M solution in 10 mM sodium phosphate buffer at pH 7 in the presence of 30% (v/v) glycerol used as cryoprotectant. The microwave power was 1  $\mu$ W and the magnetic field modulation amplitude was 0.25 mT. Parameters used for the simulation:

**spectrum A:**  $g_{xx} = 2.0066$ ,  $g_{yy} = 2.0066$ ,  $g_{zz} = 2.0017$ ,  $A_{Nxx} = 0.8$  mT,  $A_{Nyy} = 0.8$  mT,  $A_{Nzz} = 3.6$  mT.

**spectrum B:**  $g_{xx} = 2.0088$ ,  $g_{yy} = 2.0059$ ,  $g_{zz} = 2.0020$ ,  $A_{Pxx} = 5.2$  mT,  $A_{Pyy} = 5.7$  mT,  $A_{Pzz} = 6.3$  mT,  $A_{Nxx} = 0.4$  mT,  $A_{Nyy} = 0.6$  mT,  $A_{Nzz} = 3.3$  mT.

For all EPR spectra recorded at room temperature, simulations were performed considering axial g- and A-tensors. Their mean values and the range of allowed variations are given in the table below.

|           | $g_{\perp}$ | $g_{//}$   | $A_{N\perp}$ | $A_{N//}$  | $A_{P\perp}$ | $A_{P//}$ |
|-----------|-------------|------------|--------------|------------|--------------|-----------|
| <b>P</b>  | 2.0068 (5)  | 2.0018 (5) | 0.70 (6) mT  | 2.7 (1) mT |              |           |
| <b>PP</b> | 2.0070 (5)  | 2.0022 (5) | 0.7 (1) mT   | 3.3(2) mT  | 4.7(2) mT    | 5.5(4) mT |

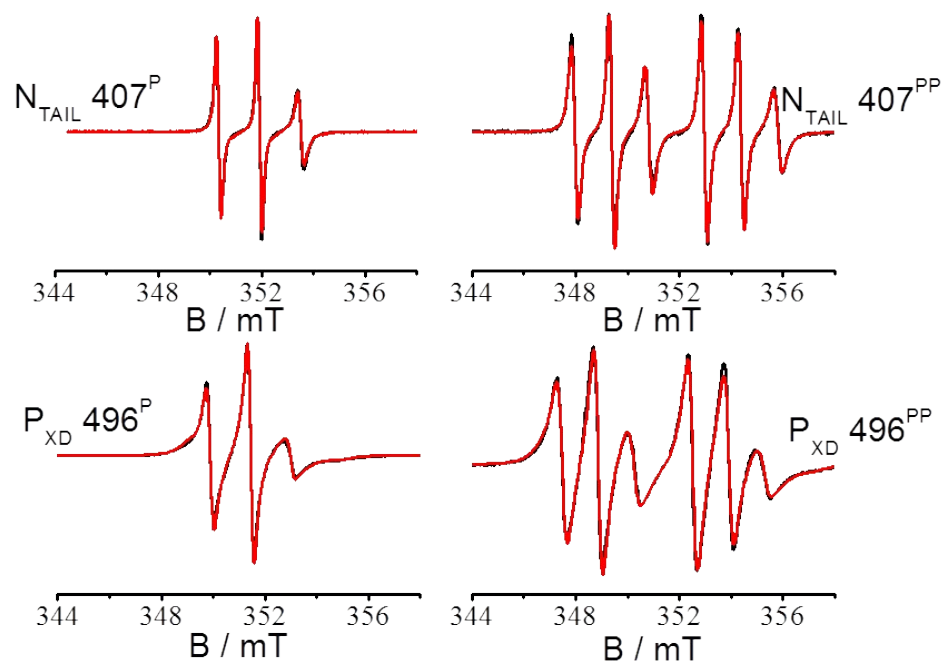

**Figure S2.** Amplitude normalized RT EPR spectra of  $N_{TAIL}$  S407C<sup>P/PP</sup> and  $P_{XD}$  K496C<sup>P/PP</sup> (black) superimposed with the simulated spectra using ROKI software (red).<sup>2</sup>

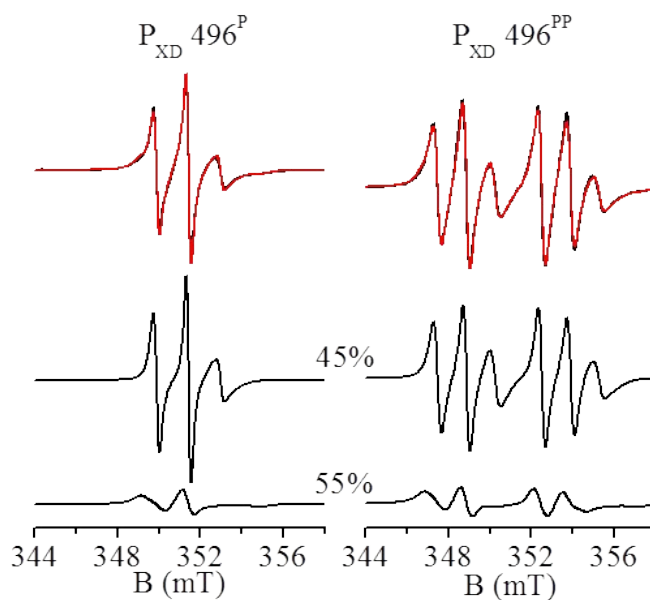

**Figure S3.** Amplitude normalized RT EPR spectra of  $P_{XD}$  K496C<sup>P</sup> and  $P_{XD}$  K496C<sup>PP</sup> along with their simulated spectra (red) as obtained using the ROKI software.<sup>1</sup> The simulation required to introduce two components accounting for 45 (narrow component) and 55 % (broad component).

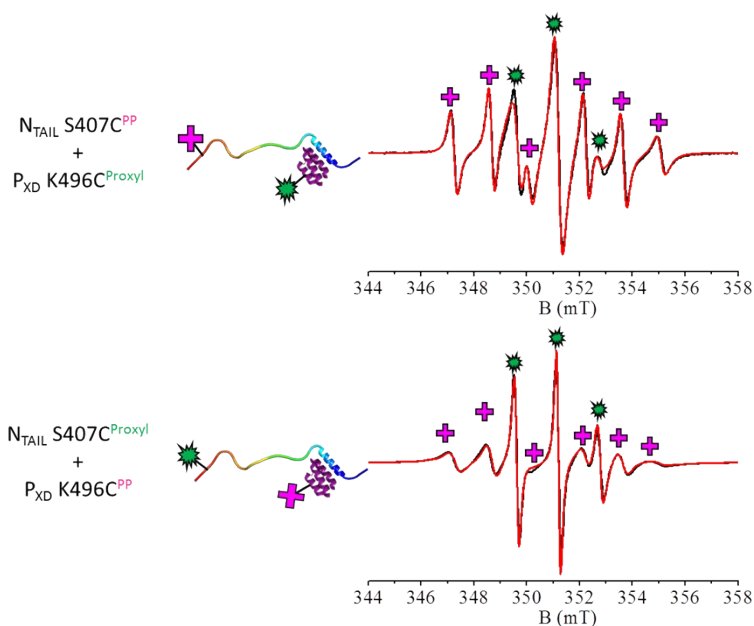

**Figure S4.** RT EPR spectra of equimolar mixtures:  $N_{TAIL} S407C^{PP}$  and  $P_{XD} K496C^P$  and  $N_{TAIL} S407C^P$  and  $P_{XD} K496C^{PP}$ . Simulated spectra in red. P and PP are illustrated by a green star and a pink cross respectively. EPR lines corresponding to each label are indicated on the EPR spectra. The overlapping between the two signals is only partial.

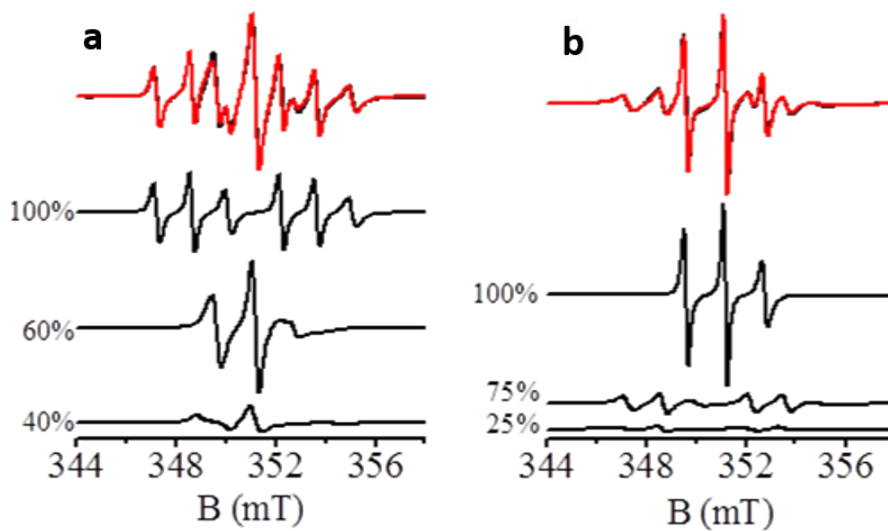

**Figure S5.** RT EPR spectra of equimolar mixtures of (a)  $N_{TAIL} S407C^{PP}$  and  $P_{XD} K496C^P$  and  $N_{TAIL} S407C^P$  and  $P_{XD} K496C^{PP}$ . Spectra were simulated using the ROKI software (red). Decomposition of spectra shows the components used to obtain the best simulations.

1. A. Rockenbauer; L. Korecz, *App. Magn. Reson.*, 1996, **10** (1-3), 29-43.
